# Supplementary material for: Ash particle refractive index model for simulating the brightness temperature spectrum of volcanic ash clouds from satellite infrared sounder measurements
Source: Copernicus journal article supplement (doi:10.5194/amt-15-435-2022), 2022-01-27
Supplement: Supplementary file 2 [file amt-15-435-2022-supplement.zip]

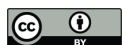

## *Supplement of*

# **Ash particle refractive index model for simulating the brightness temperature spectrum of volcanic ash clouds from satellite infrared sounder measurements**

**Hiroshi Ishimoto et al.**

*Correspondence to:* Hiroshi Ishimoto (hiroishi@mri-jma.go.jp)

- amt-15-435-2022-supplement-title-page.pdf
- Supplements
  - S1\_20211026.pdf
  - S1\_20211026.xlsx
  - S2
    - \* S2\_20211026.xlsx
    - \* figs
  - S3
    - \* CalbucoA20150424\_1329\_fig13c\_PG010\_TBBout.dat
    - \* CalbucoB20150424\_1329\_fig13f\_PG050\_TBBout.dat
    - \* CalbucoB20150424\_1329\_fig13f\_RE030\_TBBout.dat
    - \* Eyjafjallajokull20100506\_1153\_fig10c\_PG040\_TBBout.dat
    - \* Eyjafjallajokull20100506\_1153\_fig10c\_RE030\_TBBout.dat
    - \* Eyjafjallajokull20100509\_1232\_fig10f\_PG040\_TBBout.dat
    - \* Eyjafjallajokull20100509\_1232\_fig10f\_RE030\_TBBout.dat
    - \* Grimsvotn20110523\_1147\_fig12c\_PG070\_TBBout.dat
    - \* Grimsvotn20110523\_1147\_fig12c\_RE050\_TBBout.dat
    - \* Kelut20140214\_0208\_fig15d\_PG000\_TBBout.dat
    - \* Kelut20140214\_0208\_fig15d\_PG010\_TBBout.dat
    - \* Kirishimayama20110127\_0008\_fig14c\_PG010\_TBBout.dat
    - \* Kirishimayama20110127\_0008\_fig14c\_RE080\_TBBout.dat
    - \* Nishinoshima20200731\_0008\_fig14f\_PG070\_TBBout.dat
    - \* Nishinoshima20200731\_0008\_fig14f\_RE070\_TBBout.dat
    - \* Puyehue-Cordon20110606\_1041\_fig16d\_PG000\_TBBout.dat
    - \* Puyehue-Cordon20110606\_1229\_fig16g\_PG000\_TBBout.dat

The copyright of individual parts of the supplement might differ from the article licence.
